# Supplementary material for: Comparative genomics reveals high biological diversity and specific adaptations in the industrially and medically important fungal genus Aspergillus
Source: PubMed Central journal article supplement (PMC5307856; doi:10.1186/s13059-017-1151-0), 2017-02-14
Supplement: 13059_2017_1151_MOESM7_ESM.pdf [file 13059_2017_1151_MOESM7_ESM.pdf]

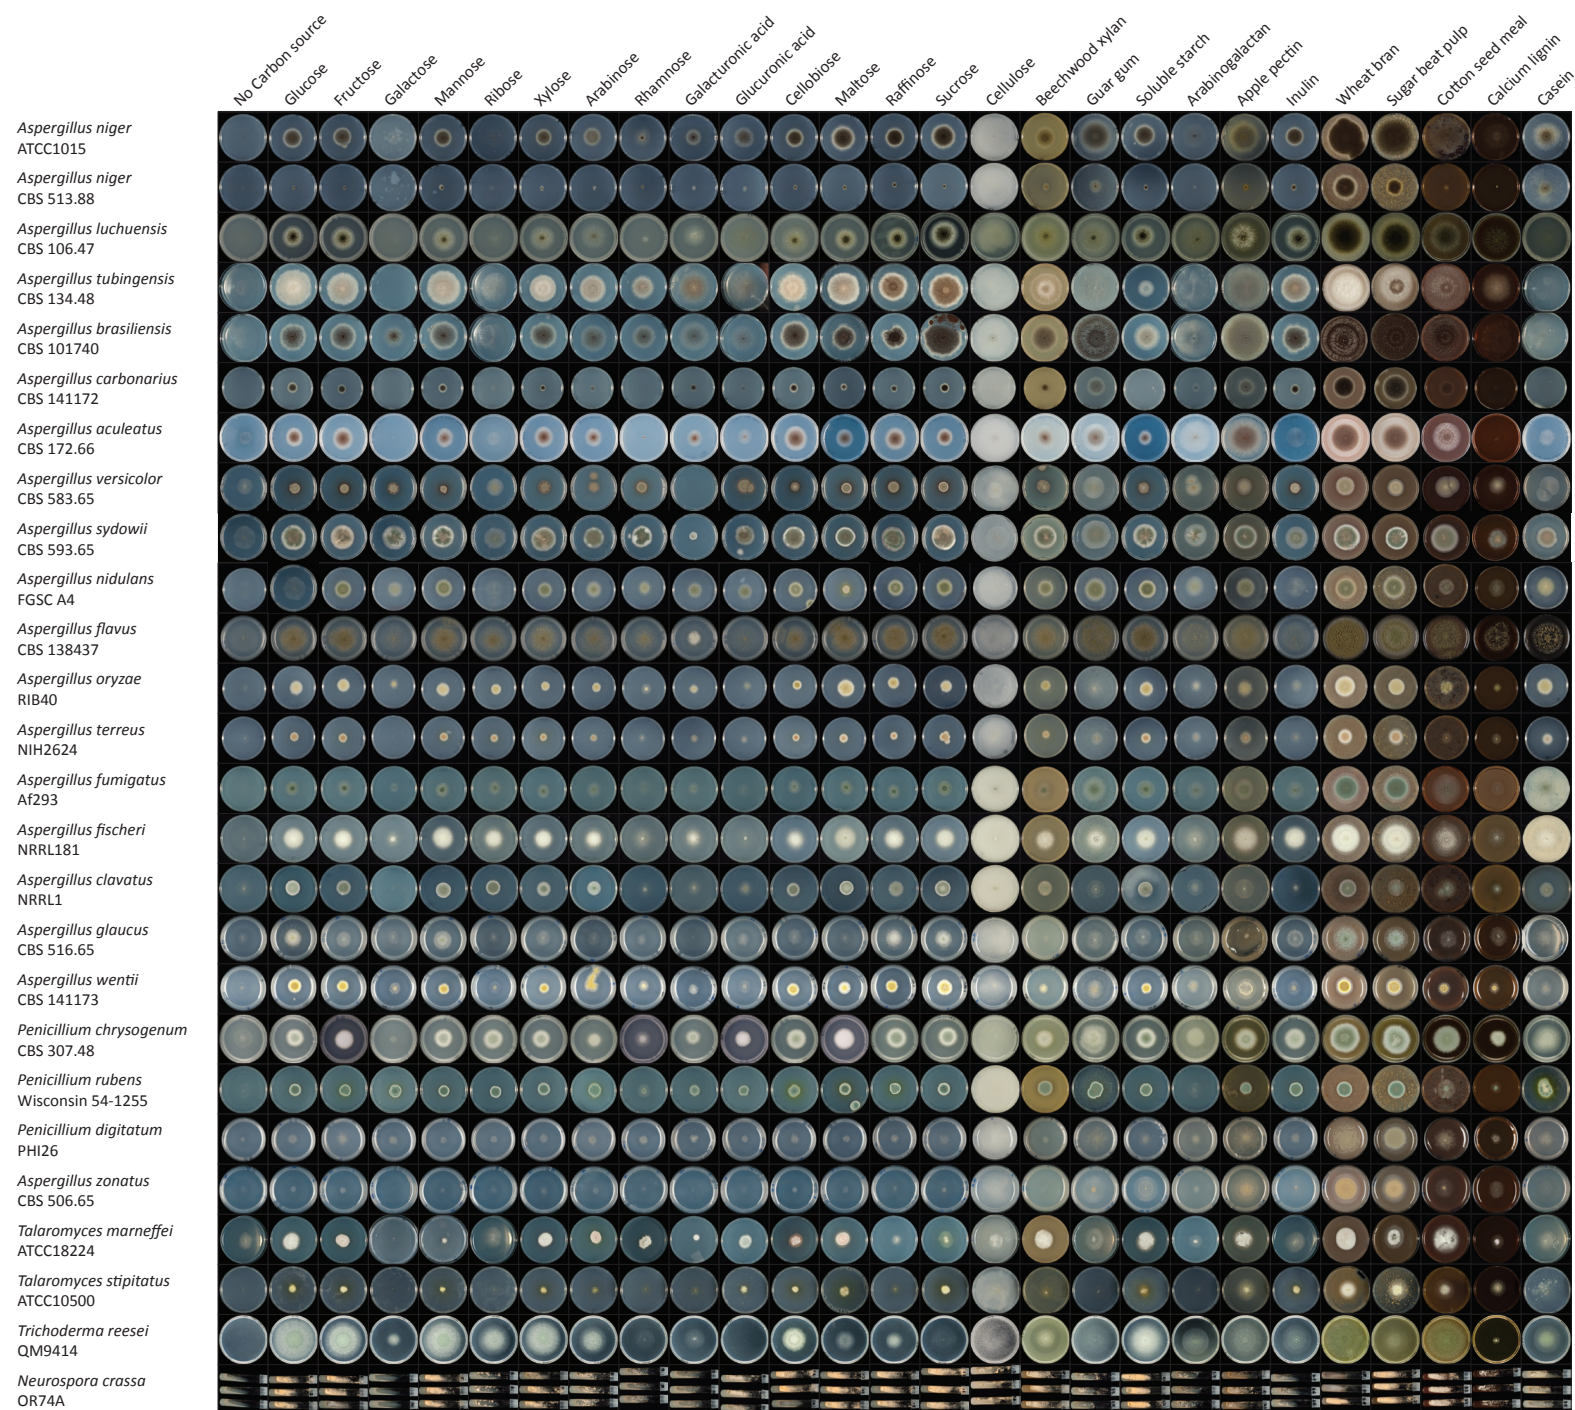

**Additional File 7. Comparative growth profiling of the aspergilli and selected other fungi.** All monosaccharides and oligosaccharides were added at 25 mM concentrations, all pure polysaccharides at 1% (w/v) and all crude carbon sources at 3% (w/v). No carbon source, casein (1% w/v) and lignin (1% w/v) were included as controls.
