# Supplementary material for: Comparative genomics reveals high biological diversity and specific adaptations in the industrially and medically important fungal genus Aspergillus
Source: PubMed Central journal article supplement (PMC5307856; doi:10.1186/s13059-017-1151-0), 2017-02-14
Supplement: 13059_2017_1151_MOESM8_ESM.pdf [file 13059_2017_1151_MOESM8_ESM.pdf]

**Additional File 8. Effect of SHAM and KCN on fungal growth and sporulation**

| <b>Species</b>             | <b>Control</b>         | <b>SHAM</b>       | <b>KCN</b> | <b>SHAM/KCN</b>        | <b>Sporulation</b>          |
|----------------------------|------------------------|-------------------|------------|------------------------|-----------------------------|
| <i>A. niger</i> N402       | Very good              | Very good         | Very good  | Very good              | Sporulation                 |
| <i>A. niger</i> CBS 513.88 | Good                   | Good              | Good       | Good                   | Sporulation                 |
| <i>A. niger</i> CBS 113.46 | Very good              | Very good         | Very good  | Very good              | Sporulation                 |
| <i>A. luchuensis</i>       | Very good              | Average           | Very good  | Weak                   | SHAM delayed sporulation    |
| <i>A. tubingensis</i>      | Very good              | Average           | Very good  | Less than average      | SHAM and KCN no sporulation |
| <i>A. brasiliensis</i>     | Very good <sup>1</sup> | Good <sup>2</sup> | Very good  | Average <sup>3</sup>   | SHAM no sporulation         |
| <i>A. carbonarius</i>      | Very good              | Good              | Very good  | Average                | Sporulation                 |
| <i>A. aculeatus</i>        | Good                   | Good              | Good       | Good                   | SHAM no sporulation         |
| <i>A. versicolor</i>       | Average                | Weak              | Average    | Weak                   | No sporulation              |
| <i>A. sydowii</i>          | Average                | Weak              | Average    | Weak                   | SHAM and KCN no sporulation |
| <i>A. nidulans</i>         | Very good              | Good              | Very good  | Weak <sup>4</sup>      | SHAM no sporulation         |
| <i>A. oryzae</i>           | Very good              | Weak              | Very good  | Weak                   | SHAM no sporulation         |
| <i>A. terreus</i>          | Very good              | Weak              | Good       | Weak                   | SHAM and KCN no sporulation |
| <i>A. fischeri</i>         | Very good              | Weak              | Very good  | Weak                   | No sporulation              |
| <i>A. clavatus</i>         | Very good              | Weak              | Very good  | Very weak <sup>5</sup> | SHAM and KCN no sporulation |
| <i>A. glaucus</i>          | Average                | No growth         | Very weak  | No growth              | No sporulation              |
| <i>A. wentii</i>           | Average                | Weak              | Average    | Weak                   | SHAM and KCN No sporulation |
| <i>A. zonatus</i>          | Very good              | Average           | Very good  | Weak                   | No sporulation              |

<sup>1</sup>Very good: growth between 65-85 mm (diameter)

<sup>2</sup>Good: growth between 50-65 mm (diameter)

<sup>3</sup>Average: 35-50 mm (diameter)

<sup>4</sup>Weak: 20-35 mm (diameter)

<sup>5</sup>Very weak: 10-20 mm (diameter)
