# Supplementary material for: Comparative genomics reveals high biological diversity and specific adaptations in the industrially and medically important fungal genus Aspergillus
Source: PubMed Central journal article supplement (PMC5307856; doi:10.1186/s13059-017-1151-0), 2017-02-14
Supplement: 13059_2017_1151_MOESM25_ESM.pdf [file 13059_2017_1151_MOESM25_ESM.pdf]

jgi|Aspnid1|6363|AN0399 NrtB  
jgi|Aspful|1610|Afulg17470 mRNA  
jgi|Neofil|2173|7000001156971211  
jgi|Aspzol|58567|e\_gw1.2.2008.1  
jgi|Aspnid1|5705|AN1008 NrtA  
jgi|Aspsy1|53362|fgenesh1\_pm.1 # 405  
jgi|Aspve1|49262|fgenesh1\_pm.1 # 1170  
jgi|Aspgl1|28588|fgenesh1\_pg.21 # 105  
jgi|Aspwe1|40392|fgenesh1\_kg.4 # 684 #\_Locus1608v1rpkml16.27  
jgi|Aspcl1|7255|7000001156880179  
jgi|Aspful|1150|Afulg12850 mRNA  
jgi|Neofil|2646|7000001156973616  
jgi|Aspac1|38369|Genemark1.545 g  
jgi|Aspca3|159116|estExt\_Genewise1Plus.C 11082  
jgi|Aspbr1|41323|fgenesh1\_kg.4 # 627 #\_Locus1876v1rpkml11.71  
jgi|Aspni\_DSM\_1|161829|An08g05670m.01  
jgi|Asptu1|112586|e\_gw1.1.743.1  
jgi|Aspfo1|130828|e\_gw1.4.716.1  
jgi|Aspka1\_1|18106|AKAW 06633  
jgi|Asptel1|476|ATET 00476  
jgi|Aspor1|6220|AO090012000623 mRNA  
jgi|Aspfl1|27006|7000001155834032

GLVTTTPQGLIALRFFVIGILGATFVPCQVWCTGFFDKNIVGTANSLAGGFNAGGGITYFV  
GLVTSPOGLIALRFFIGILGATFVPCQVWCTGFFDKNVVG TANALAGGFNAGGGITYFV  
GLVTSPOGLIALRFFIGILGATFVPCQVWCTGFFDKNVVG TANALAGGFNAGGGITYFV  
GLVTTSPGLIALRFFVIGILGATFVPCQVWCTGFFDKNIVGTANALAGWGNAGGGITYFV  
GLVTTSPQGLIALRFFIGILGGTFVPCQVWCTGFFDKNIVGTANSLAAGLGNAGGGITYFV  
GLVTTTPQGLIALRFFIGILGGTFVPCQVWCTGFFDKNVVG TANSLAAGLGNAGGGITYFV  
GLVTTTPQGLIALRFFIGILGGTFVPCQVWCTGFFDKNVVG TANSLAAGLGNAGGGITYFV  
GLVTNPQGLIALRFFVIGILGGTFVPCQVWCTGFFDKNIVGTANSLAGWGNAGGGITYFI  
GLVTTTPKGLIALRFFVIGILGGTFVPCQVWCTGFFDKNIVGTANSLAAGWGNAGGGITYFV  
GLVTNPGLIALRFFIGILGGTFVPCQVWCTGFFDKNIVGTANSLAAGWGNAGGGITYFL  
GLVTTTPNGLIALRFFVIGILGGTFVPCQVWCTGFFDKNIVGTANSLAAGWGNAGGGITYFV  
GLVTTTPNGLIALRFFVIGILGGTFVPCQVWCTGFFDKNIVGTANSLAAGWGNAGGGITYFV  
GLVTTTPKGLIALRFFIGILGGTFVPCQVWCTGFFDKNIVGMANALAGWGNAGGGITYFV  
GLVTTPEGLIALRFFVIGILGGTFVPCQVWCTGFFDKNIVGAANALAGWGNAGGGITFFV  
GLVTTTPNGLIALRFFVIGILGGTFVPCQVWCTGFFDKNIVGAANALAGWGNAGGGITFFV  
GLVTTTPNGLIALRFFVIGILGGTFVPCQVWCTGFFDKNIVGTANALAGWGNAGGGITFFV  
GLVTTTPNGLIALRFFVIGILGGTFVPCQVWCTGFFDKNIVGTANALAGWGNAGGGITFFV  
GLVTTTPNGLIALRFFVIGILGGTFVPCQVWCTGFFDKNIVGTANALAGWGNAGGGITFFV  
GLVTTNSRGLIALRFFVIGILGGTFVPCQVWCTGFFDKNIVGTANSLAAGWGNAGGGITYFV  
GLVTNAQGLIALRFFVIGILGGTFVPCQVWCTGFFDKNIVGTANSLAAGWGNAGGGITYFV  
GLVTNAQGLIALRFFVIGILGGTFVPCQVWCTGFFDKNIVGTANSLAAGWGNAGGGITYFV  
\*\*\*\*.\*\*\*\*\*:\*. \* .\*\*\*\*\*. :.\* \*\*:\* \* .\*\*\*\*\*.\*:

jgi|Aspnid1|6363|AN0399 NrtB  
jgi|Aspful|1610|Afulg17470 mRNA  
jgi|Neofil|2173|7000001156971211  
jgi|Aspzol|58567|e\_gw1.2.2008.1  
jgi|Aspnid1|5705|AN1008 NrtA  
jgi|Aspsy1|53362|fgenesh1\_pm.1 # 405  
jgi|Aspve1|49262|fgenesh1\_pm.1 # 1170  
jgi|Aspgl1|28588|fgenesh1\_pg.21 # 105  
jgi|Aspwe1|40392|fgenesh1\_kg.4 # 684 #\_Locus1608v1rpkml16.27  
jgi|Aspcl1|7255|7000001156880179  
jgi|Aspful|1150|Afulg12850 mRNA  
jgi|Neofil|2646|7000001156973616  
jgi|Aspac1|38369|Genemark1.545 g  
jgi|Aspca3|159116|estExt\_Genewise1Plus.C 11082  
jgi|Aspbr1|41323|fgenesh1\_kg.4 # 627 #\_Locus1876v1rpkml11.71  
jgi|Aspni\_DSM\_1|161829|An08g05670m.01  
jgi|Asptu1|112586|e\_gw1.1.743.1  
jgi|Aspfo1|130828|e\_gw1.4.716.1  
jgi|Aspka1\_1|18106|AKAW 06633  
jgi|Asptel1|476|ATET 00476  
jgi|Aspor1|6220|AO090012000623 mRNA  
jgi|Aspfl1|27006|7000001155834032

MPAIYDSFVHDRGLTPHKAWRVSYIVPFI I IVSIALAMLFTCPDPTGKWADREKT----  
MPAIYDSLVSQGLTPHRAWRVAYVVPFI I IVTLALAMLFLCEDTPTGKWSQRNDN----  
MPAIYDSLVSQGLTPHRAWRVAYVVPFI I IVTLALSMLFLCEDTPTGKWSQRNDN----  
MPAIFDSLVSQGLSAHKAWRVAYIVPFI I IVVIAALGMLFTCEDTPTGKWSERQIWMKEE  
MPAIFDSLIRDQGLPAHKAWRVAYIVPFI I IVVIAALGMLFTCEDTPTGKWSERHIWMKED  
MPAIFDSLVDHNSGLPAHKAWRVAYIVPFI I IVVIAALGMLFTCEDTPTGKWSERHIWTKEE  
MPAIFDSLVSQGLAAHKAWRVAYIVPFI I IVVIALGMLFTCEDTPTGKWSERHIWTKEE  
MPTVYDSLVSQGLAPHKAWRVAYIVPFI I IVVALAVAMLFTCEDTPTGKWSERHIWMKEN  
MPAIYDSLVTSGLPHPHKAWRVSYVVPFI I IVSLALCMLFTCEDTPTGKWSERHIWMKDQ  
MPAIFDSLVSRSGLAPHKAWRVAYVVPFI I IVVLALCMLLTCEDTPTGKWSERHIWMKES  
MPAIYDSLVSQGLAPHKAWRVAYIVPFI I IVVLALCMLLICEDTPTGKWSERHIWMKEN  
MPAIYDSLVSQGLAPHKAWRVAYIVPFI I IVVLALCMLLICEDTPTGKWSERHIWMKEN  
MPAIYDSLVSQGLTPHKAWRVAFIVPFI I IVVIAVAMLFLCEDTPTGKWSERHLWAREM  
MPAVYDSLNVQGLTPHKAWRVSYIVPFI I IVAVALTMLFVCEDTPTGKWSERHLWVKEA  
MPAVYDSLVAQGLTPHKAWRVAYIVPFI I IVGVALTMLFVCEDTPTGKWSERHLWVKEA  
MPAVYDSLVKVQGLTPHKAWRVAYIVPFI I IVGVALTMLFVCEDTPTGKWSERHLWVKEA  
MPAVYDSLVKVQGLPAPHKAWRVAYIVPFI I IVGVALTMLFVCEDTPTGKWSERHLWVKEA  
MPAVYDSLVKVQGLPAPHKAWRVAYIVPFI I IVGVALTMLFVCEDTPTGKWSERHLWVKEA  
MPAVYDSLVKVQGLPAPHKAWRVAYIVPFI I IVGVALTMLFVCEDTPTGKWSERHLWVKEA  
MPAIFDSLVDHNSGLPAHKAWRVAYIVPFI I IVVIAVAMFVFTCEDTPTGKWSERHLWAEET  
MPAIFDSLVDHNSGLPAHKAWRVAYIVPFI I IVVIAVAMFVFTCEDTPTGKWSERHLWAEET  
\*:\*:\*:\*:\*: . \* \* :\*\*\*\*\*: : \* : \* \* : \* : \* \* \* \* \* :\*:\*:





jgi|Aspnid1|6363|AN0399 NrtB  
 jgi|Aspful|1610|Afulg17470 mRNA  
 jgi|Neofi1|2173|7000001156971211  
 jgi|Aspzol|58567|e\_gw1.2.2008.1  
 jgi|Aspnid1|5705|AN1008 NrtA  
 jgi|Aspsy1|53362|fgenesh1\_pm.1\_#\_405  
 jgi|Aspvel|49262|fgenesh1\_pm.1\_#\_1170  
 jgi|Aspgl1|28588|fgenesh1\_pg.2I\_#\_105  
 jgi|Aspwe1|40392|fgenesh1\_kg.4\_#\_684\_#\_Locus1608v1rpkm116.27  
 jgi|Aspcl1|7255|7000001156880179  
 jgi|Aspful|1150|Afulg12850 mRNA  
 jgi|Neofi1|2646|7000001156973616  
 jgi|Aspac1|38369|Genemark1.545 g  
 jgi|Aspca3|159116|estExt Genewise1Plus.C\_11082  
 jgi|Aspbr1|41323|fgenesh1\_kg.4\_#\_627\_#\_Locus1876v1rpkm111.71  
 jgi|Aspni\_DSM\_1|161829|An08g05670m.0I  
 jgi|AsptuI|112586|e\_gw1.1.743.1  
 jgi|Aspfo1|130828|e\_gw1.4.716.1  
 jgi|Aspka1\_1|18106|AKAW\_06633  
 jgi|Aspte1|476|ATET\_00476  
 jgi|Aspor1|6220|AO090012000623 mRNA  
 jgi|Aspf11|27006|7000001155834032

NGTQYHRSLWIIIGFIIIGCTLFFSWVRPVPKQNH\*---  
 NGTHYDRALWIIIGAIIVAGVNICVSWIRPVPRT\*-----  
 NGTHYDRALWIIIGAIAGVNICVSWIRPVPRT\*-----  
 NGTNYARGMWIIIGVISLGVNLSMSWVRPMPRSEMP\*--  
 SHHDYARGIWIIIGVISMAVFI SVSWVRPVPKSOQRE\*--  
 SHHDYARGIWIIIGVISMAANI AVAWIRPVPKSOQRE\*--  
 SHHDYARGIWIIIGVISIAANI AVAWIRPVPKSOQMD\*--  
 NASHYARSLWIIIGVICIAGNMLLSWIRPVRGQTTTRS\*  
 NGGHYPRSLWIIIGVIAIAGNLVSWINPVPQRSQVRVS\*  
 NGTHYARSLWIIIGVISIAANLAVAWIRPVPKSOQMQRQ\*  
 NETHYSRSLWIIIGVISIAANLAVSWIRPVPKSOQMMRQ\*  
 NETHYSQSLWIIIGVISIAANLAVSWIRPVPKSOQMMRQ\*  
 NGSDYSRSLWIIIGAISIGANVLVSWIRPVSQKQVVQR\*  
 NGSHYARSLWIIIGVISLAANVVT SWIRPVAKNPVVVSQ\*  
 NGSHYAQSLWIIIGAISLAANVGISWIRPVAKNPVVKQ\*  
 NGSHYARSLWIIIGVISLAANVCISWIRPVAKNPVVRQ\*  
 NGSHYAQSLWIIIGAISLAANVGISWIRPVAKNPVVRQ\*  
 NGSHYAQSLWIIIGAISLAANVGISWIRPVAKNPVVRQ\*  
 NGSHYAQSLWIIIGAISLAANVGISWIRPVAKNPVVRQ\*  
 NGHDYARSLWIIIGVLCIATNLLVAVIRPVPREQMVR\*--  
 NGSHYARSLWIIIGITIAIANLAVSWIRPVPRRQMV\*--  
 NGSHYARSLWIIIGITIAIANLAVSWIRPVPRRQMV\*--  
 . . \* . : : \* : \* : . : : \* : . : :

Pairwise Similarity % using EMBOSS Water (Smith-Waterman algorithm)

|                                                              | NrtA | NrtB |
|--------------------------------------------------------------|------|------|
| jgi Aspnid1 6363 AN0399 NrtB                                 | 75.0 | 100  |
| jgi Aspful 1610 Afulg17470 mRNA                              | 75.8 | 82.5 |
| jgi Neofi1 2173 7000001156971211                             | 76.6 | 83.6 |
| jgi Aspzol 58567 e_gw1.2.2008.1                              | 83.0 | 80.1 |
| jgi Aspnid1 5705 AN1008 NrtA                                 | 100  | 75.0 |
| jgi Aspsy1 53362 fgenesh1_pm.1_#_405                         | 92.5 | 77.6 |
| jgi Aspvel 49262 fgenesh1_pm.1_#_1170                        | 91.4 | 77.0 |
| jgi Aspgl1 28588 fgenesh1_pg.2I_#_105                        | 83.9 | 74.8 |
| jgi Aspwe1 40392 fgenesh1_kg.4_#_684_#_Locus1608v1rpkm116.27 | 86.1 | 79.7 |
| jgi Aspcl1 7255 7000001156880179                             | 85.0 | 79.8 |
| jgi Aspful 1150 Afulg12850 mRNA                              | 86.2 | 79.1 |
| jgi Neofi1 2646 7000001156973616                             | 86.2 | 79.3 |
| jgi Aspac1 38369 Genemark1.545 g                             | 83.2 | 76.8 |
| jgi Aspca3 159116 estExt Genewise1Plus.C_11082               | 86.0 | 78.3 |
| jgi Aspbr1 41323 fgenesh1_kg.4_#_627_#_Locus1876v1rpkm111.71 | 85.0 | 75.3 |
| jgi Aspni_DSM_1 161829 An08g05670m.0I                        | 84.6 | 77.8 |
| jgi AsptuI 112586 e_gw1.1.743.1                              | 84.4 | 78.0 |
| jgi Aspfo1 130828 e_gw1.4.716.1                              | 84.6 | 78.2 |
| jgi Aspka1_1 18106 AKAW_06633                                | 84.6 | 78.2 |
| jgi Aspte1 476 ATET_00476                                    | 83.9 | 78.6 |
| jgi Aspor1 6220 AO090012000623 mRNA                          | 85.8 | 79.2 |
| jgi Aspf11 27006 7000001155834032                            | 85.8 | 79.6 |
