# Supplementary material for: Comparative genomics reveals high biological diversity and specific adaptations in the industrially and medically important fungal genus Aspergillus
Source: PubMed Central journal article supplement (PMC5307856; doi:10.1186/s13059-017-1151-0), 2017-02-14
Supplement: 13059_2017_1151_MOESM26_ESM.pdf [file 13059_2017_1151_MOESM26_ESM.pdf]

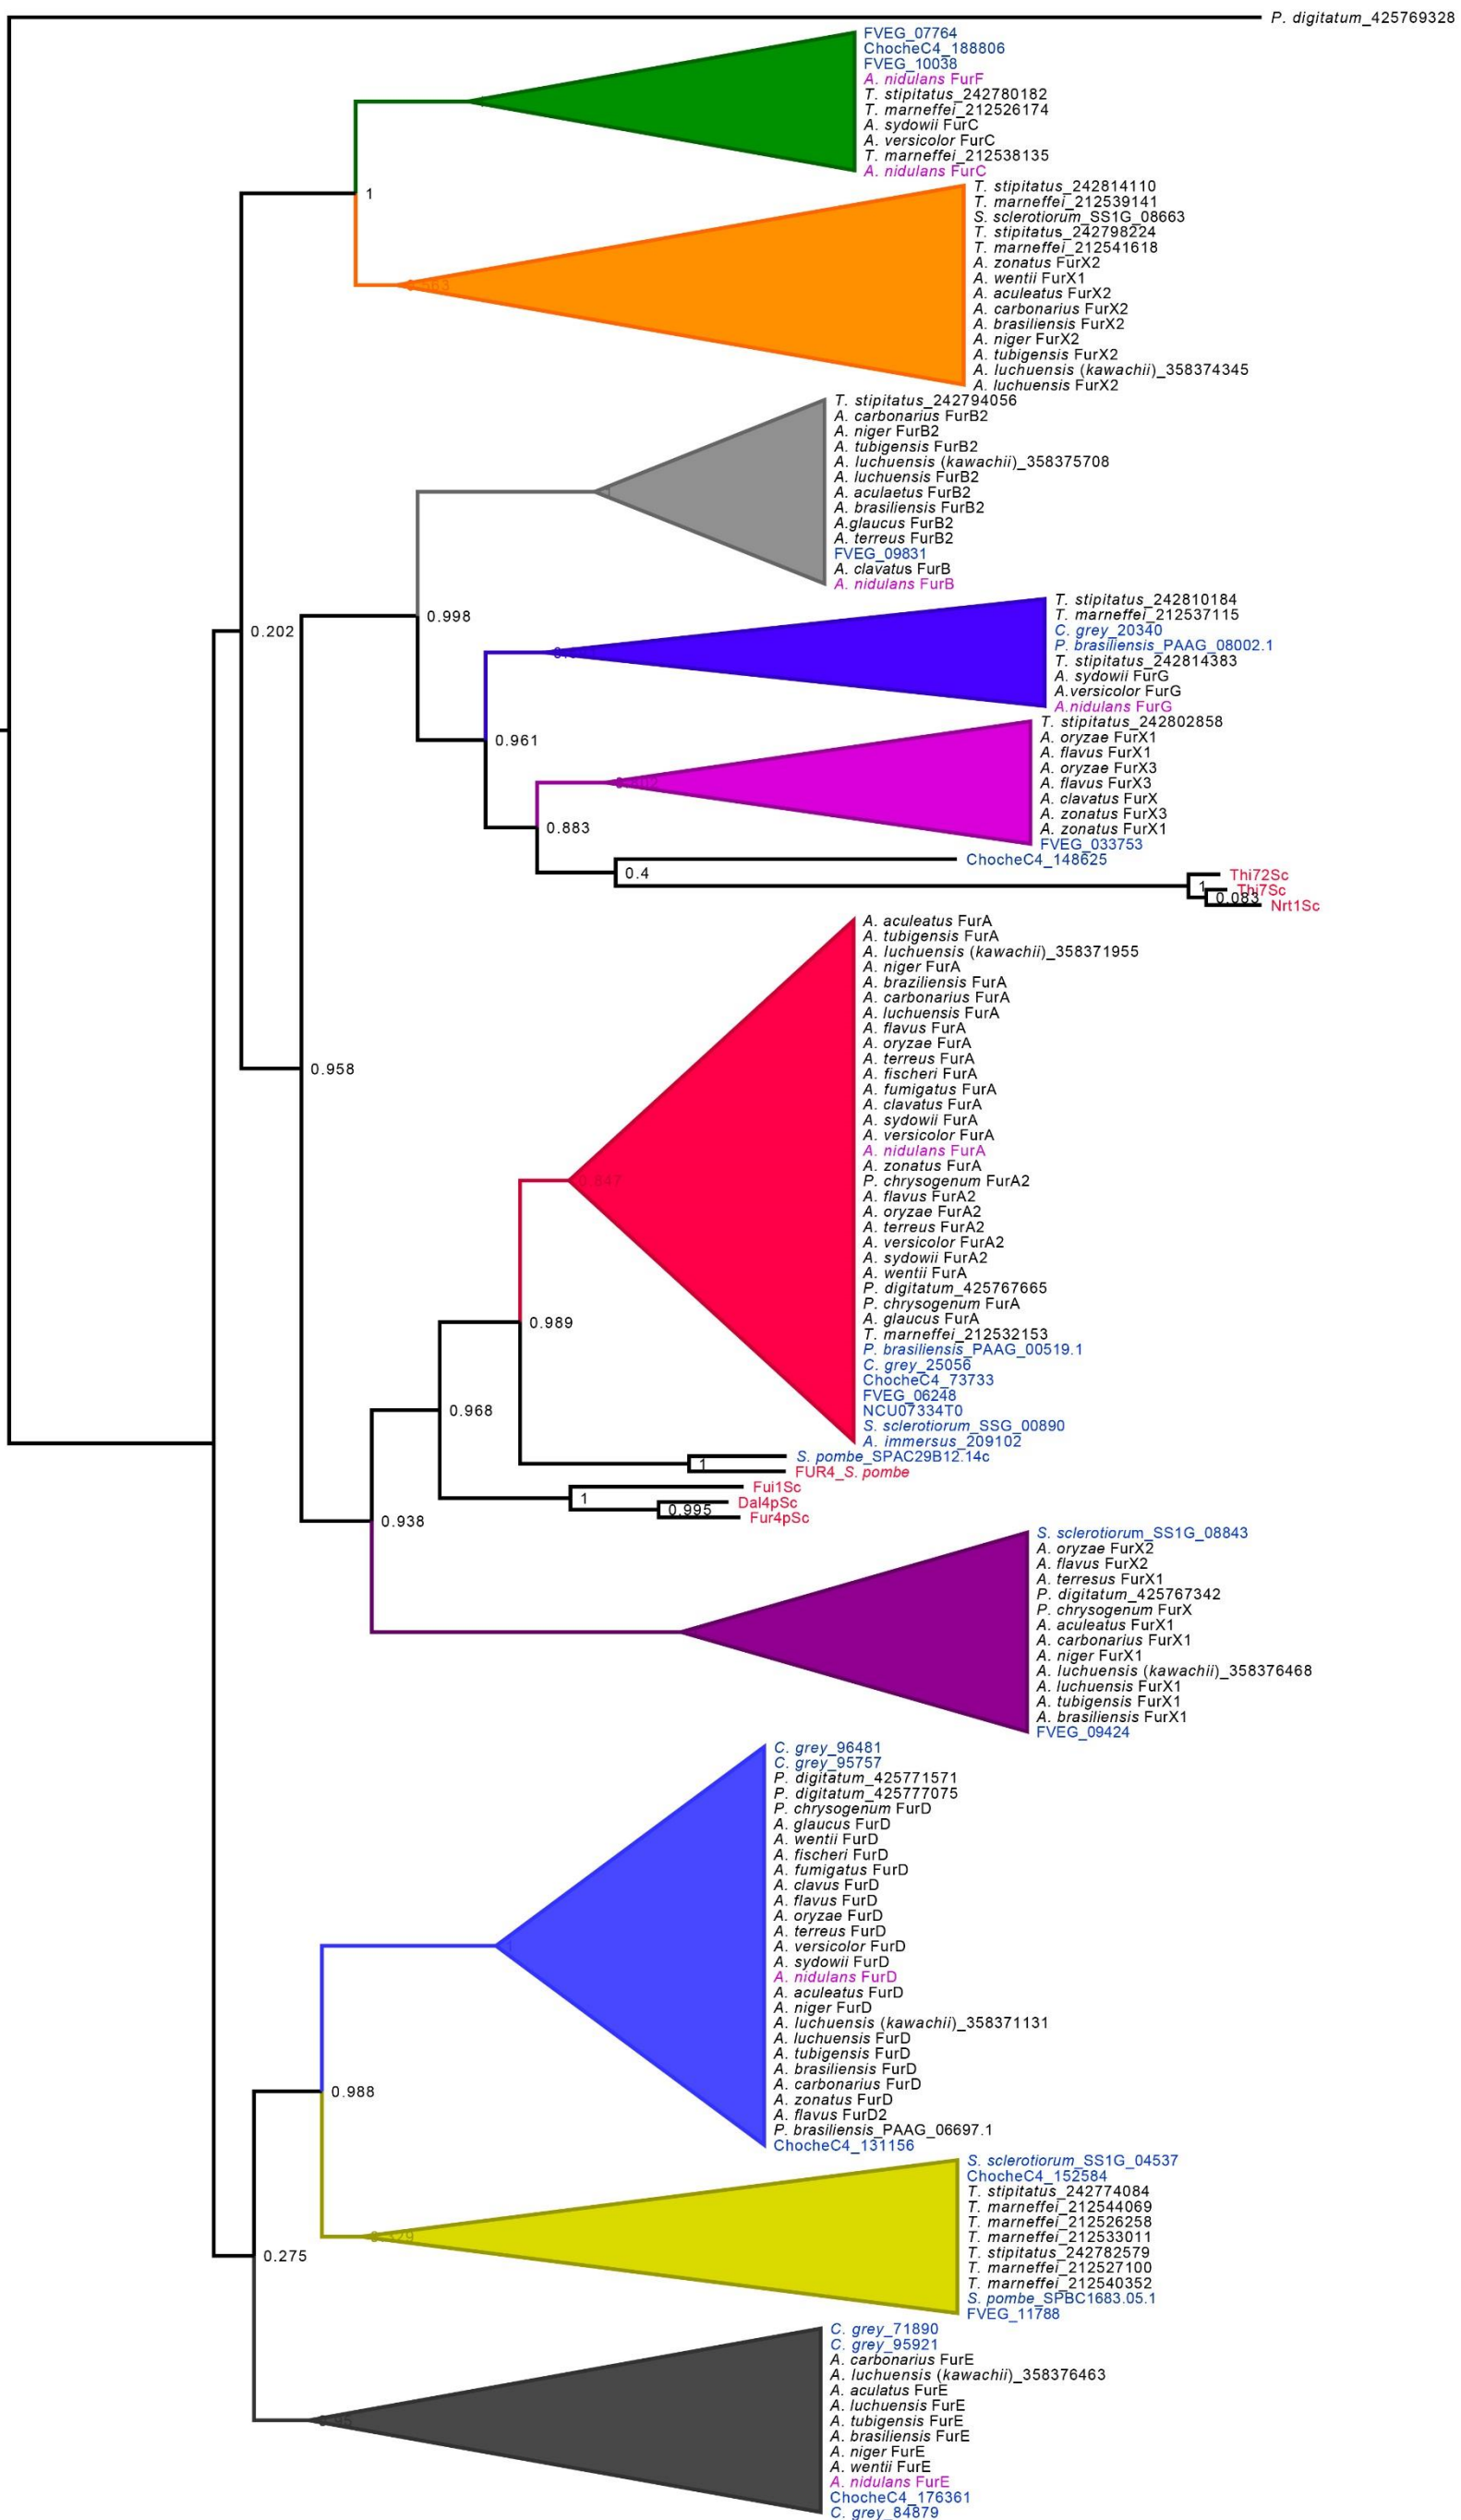

**Additional File 26. Maximum likelihood rooted tree of Fur-like transporters of the aspergilli and some other members of the Eurotiales (*Penicillium*, *Talaromyces*).** Some sequences from outside these groups included are in blue color lettering. The tree is shown in a cartoon form, built around the characterized paralogues of *A. nidulans* [1, 2]. Orthologs of each of the *A. nidulans* paralogs (in purple) are characterized by identity  $\geq$  60% and synteny. These are called with the same letter as the paralogs of *A. nidulans*, followed by a number in the few cases where identity is lower (e.g. FurB2 are proteins present in several aspergilli showing 55-58% identity with the FurB of *A. nidulans* or *A. clavatus*). Homologs with lower identities (in the range 25-45%) are named with an X followed when necessary with a number. Characterized transporters of *S. cerevisiae* and *S. pombe* are shown by their gene names in red lettering. Other proteins are indicated by the accession number in JGI Mycosm following the species names. These are: *Eurotiomycetes*, *Onigenales*, *Paracoccidioides brasiliensis*. *Sordariomycetes*, *Fusarium verticilloides* (*Hypocreomycetidae*, FGVE) and the only homolog present in *N. crassa* (*Sordariales*, NCU). *Leotiomycetes*, *Sclerotinia sclerotium*. *Dothideomycetes*, *Cochliobolus heterostrophus*. *Lecanoomycetes*, *Xanthoria parietina*. *Pezizomycetes*, *Ascobolus immersus*. *P. digitatum\_425769328* is in fact a FCY transporter and constitutes a suitable outgroup. It is also part of Fig. 13 as a putative FycA ortholog. Values at the nodes are aLTRs (approximate likelihood ratio test) [3].

1. Hamari Z, Amillis S, Drevet C, Apostolaki A, Vagvolgyi C, Diallinas G, Scazzocchio C: **Convergent evolution and orphan genes in the Fur4p-like family and characterization of a general nucleoside transporter in *Aspergillus nidulans*.** *Mol Microbiol* 2009, **73**:43-57.
2. Kryptou E, Evangelidis T, Bobonis J, Pittis AA, Gabaldon T, Scazzocchio C, Mikros E, Diallinas G: **Origin, diversification and substrate specificity in the family of NCS1/FUR transporters.** *Mol Microbiol* 2015, **96**:927-950.
3. Anisimova M, Gascuel O: **Approximate likelihood-ratio test for branches: A fast, accurate, and powerful alternative.** *Syst Biol* 2006, **55**:539-552.
