# Supplementary material for: Comparative genomics reveals high biological diversity and specific adaptations in the industrially and medically important fungal genus Aspergillus
Source: PubMed Central journal article supplement (PMC5307856; doi:10.1186/s13059-017-1151-0), 2017-02-14
Supplement: 13059_2017_1151_MOESM33_ESM.pdf [file 13059_2017_1151_MOESM33_ESM.pdf]

**Additional File 33. Kinases presented in at least one yeast species and with no orthologous genes in other eukaryotes.** Yeast species analyzed: *P. pastoris* (Picpa1), *S. cerevisiae* (Sacce1, SacceM3707\_1) and/or *S. pombe* (Schpo1). Systematic name and description of kinase function refer to *S. cerevisiae* Sacce1.

| Cluster           | Picpa1 | Sacce1 | Sacce<br>M3707_1 | Schpo1 | Systematic<br>Name | Description                                |
|-------------------|--------|--------|------------------|--------|--------------------|--------------------------------------------|
| FungiJGICTBE22669 | 0      | 1      | 1                | 0      | YPL026C            | Suppressor Kinase of SNF3                  |
| FungiJGICTBE23938 | 0      | 1      | 1                | 0      | YDR466W            | Pkb-activating Kinase Homolog              |
| FungiJGICTBE23984 | 0      | 1      | 1                | 0      | YIL095W            | p53 Regulatory Kinase                      |
| FungiJGICTBE23997 | 0      | 1      | 1                | 0      | YIL035C            | Casein Kinase Alpha subunit                |
| FungiJGICTBE24081 | 0      | 1      | 1                | 0      | YER123W            | Yeast Casein Kinase                        |
| FungiJGICTBE24161 | 0      | 1      | 1                | 0      | YGL158W            | Radiation sensitivity Complementing Kinase |
| FungiJGICTBE24216 | 0      | 1      | 1                | 0      | YGR052W            | Found in Mitochondrial Proteome            |
| FungiJGICTBE24312 | 0      | 1      | 1                | 0      | YHR082C            | Kinase Suppressing Prp20-10                |
| FungiJGICTBE24315 | 0      | 1      | 1                | 0      | YBR059C            | Ark family Kinase-Like protein             |
| FungiJGICTBE24364 | 0      | 1      | 1                | 0      | YJL165C            | HALotolerance                              |
| FungiJGICTBE24442 | 0      | 1      | 1                | 0      | YKL168C            |                                            |
| FungiJGICTBE24445 | 0      | 1      | 1                | 0      | YKL161C            | Kinase Dead X-talker                       |
| FungiJGICTBE24459 | 0      | 1      | 1                | 0      | YKL101W            | Histone Synthetic Lethal                   |
| FungiJGICTBE24480 | 0      | 1      | 1                | 0      | YKL048C            | ELongated Morphology                       |
| FungiJGICTBE24796 | 0      | 1      | 1                | 0      | YMR291W            | Topoisomerase I Damage Affected            |
| FungiJGICTBE24919 | 0      | 1      | 1                | 0      | YOL128C            | Yeast homolog of Glycogen synthase Kinase  |
| FungiJGICTBE24928 | 0      | 1      | 1                | 0      | YOL100W            | Pkb-activating Kinase Homolog              |
| FungiJGICTBE25222 | 0      | 1      | 1                | 0      | YDL214C            | Pheromone Response Regulator               |

|                   |   |   |   |   |                     |                                                                                 |
|-------------------|---|---|---|---|---------------------|---------------------------------------------------------------------------------|
| FungiJGICTBE25245 | 0 | 1 | 1 | 0 | YAR019C             | Cell Division Cycle                                                             |
| FungiJGICTBE25246 | 0 | 1 | 1 | 0 | YDL079C             | Mds1p Related Kinase                                                            |
| FungiJGICTBE12570 | 1 | 2 | 2 | 0 | YOR233W,<br>YPL141C | KINase, Fatty acyl-CoA<br>synthetase and RNA<br>processing-associated<br>Kinase |
| FungiJGICTBE12571 | 1 | 2 | 2 | 0 | YDR507C,<br>YCL024W | Growth Inhibitory                                                               |
| FungiJGICTBE13605 | 0 | 2 | 2 | 0 | YJR059W,<br>YKL198C | Putative<br>serine/Threonine<br>protein Kinase                                  |
| FungiJGICTBE14077 | 1 | 1 | 1 | 1 | YMR001C             | Cell Division Cycle                                                             |
| FungiJGICTBE15775 | 1 | 1 | 1 | 0 | YPR106W             | Inhibition of<br>Staurosporine<br>Resistance                                    |
| FungiJGICTBE16796 | 1 | 1 | 1 | 0 | YDL025C             | Ribosome biogenesis<br>and TRNA synthetase-<br>associated Kinase                |
| FungiJGICTBE17172 | 1 | 1 | 1 | 0 | YFL029C             | Cdk-Activating Kinase                                                           |
| FungiJGICTBE17365 | 1 | 1 | 1 | 0 | YKL171W             | Nitrogen Network<br>Kinase                                                      |
| FungiJGICTBE17408 | 1 | 1 | 1 | 0 | YPR054W             |                                                                                 |
| FungiJGICTBE17449 | 1 | 1 | 1 | 0 | YHR102W             | Kinase that Interacts<br>with Cdc31p                                            |
| FungiJGICTBE17505 | 1 | 1 | 1 | 0 | YNL307C             | Meiosis and<br>Centromere regulatory<br>Kinase                                  |

---
