# Supplementary material for: Comparative genomics reveals high biological diversity and specific adaptations in the industrially and medically important fungal genus Aspergillus
Source: PubMed Central journal article supplement (PMC5307856; doi:10.1186/s13059-017-1151-0), 2017-02-14
Supplement: 13059_2017_1151_MOESM39_ESM.pdf [file 13059_2017_1151_MOESM39_ESM.pdf]

## Additional File 39. Phylogeny of the Metallophos domain in *A. nidulans*

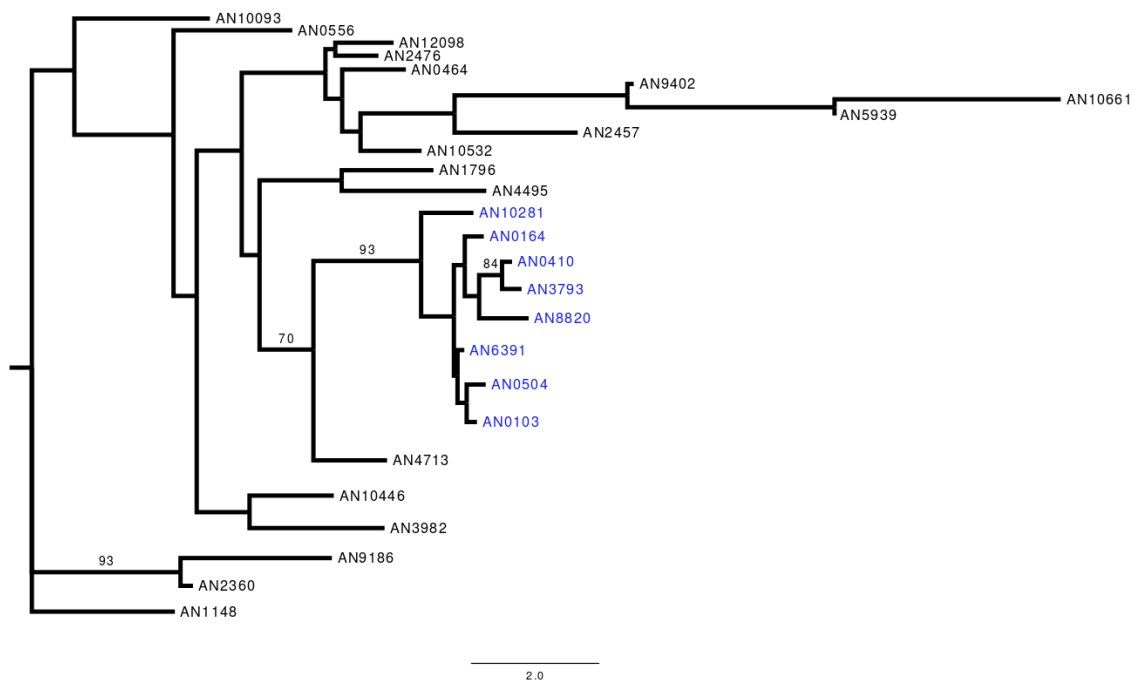

The evolutionary model was estimated using ProtTest (<http://darwin.uvigo.es/software/prottest3/>). Phylogeny was inferred using RAXML (<http://www.exelixis-lab.org/>) under the model BLOSUM62 +  $\Gamma$  + I + F and 500 bootstrap replicates. Sequences in blue are PPPs from Son and Osmani [1]. The PPPs form a clear clade in the tree with a bootstrap support of 93% (values of 50% or greater are shown). This group was used to create a PPP-specific HMM.

1. Son S, Osmani SA: **Analysis of all protein phosphatase genes in *Aspergillus nidulans* identifies a new mitotic regulator, *fcp1*.** *Eukaryot Cell* 2009, **8**:573-585.
